## **TGF $\beta$ mediated structural remodeling facilitates optic fissure fusion and the necessity of BMP antagonism in this process**

Max D. Knickmeyer<sup>1</sup>, Juan L. Mateo<sup>2</sup>, Priska Eckert<sup>1</sup>, Eleni Roussa<sup>1</sup>, Belal Rahhal<sup>1,5</sup>,  
Aimee Zuniga<sup>3</sup>, Kerstin Kriegelstein<sup>1</sup>, Joachim Wittbrodt<sup>4</sup>, Stephan Heermann<sup>1\*</sup>

<sup>1</sup> Department of Molecular Embryology, Institute of Anatomy and Cell Biology, Faculty of Medicine, University Freiburg, 79104 Freiburg, Germany

<sup>2</sup> Departamento de Informática, Universidad de Oviedo, Jesús Arias de Velasco, 33005, Oviedo, Spain

<sup>3</sup> Developmental Genetics, University of Basel Medical School, 4058 Basel, Switzerland

<sup>4</sup> Centre for Organismal Studies, Heidelberg, 69120 Heidelberg, Germany

<sup>5</sup> present address: School of Medicine and health sciences, An-Najah National University, Nablus, Palestine

\* Author for correspondence:

Stephan Heermann: [stephan.heermann@anat.uni-freiburg.de](mailto:stephan.heermann@anat.uni-freiburg.de)

## Summary statement

TGF $\beta$  is crucial for optic fissure fusion, involving *cdh6*. TGF $\beta$  mediated optic fissure fusion is potentially hampered by BMP signaling, which is blocked by TGF $\beta$  induced BMP antagonists within the optic fissure margins.

## Abstract

The optic fissure is a transient gap in the developing vertebrate eye, which must be closed as development proceeds. A persisting optic fissure, coloboma, is a major cause for blindness in children. Multiple factors are genetically linked to coloboma formation. However, especially the process of optic fissure fusion is still largely elusive on a cellular and molecular basis.

We found a coloboma phenotype in mice with a targeted inactivation of the transforming growth factor 2 (TGF $\beta$ 2). Here the optic fissure margins got in touch, however, failed to fuse. Transcriptomic analyses indicated TGF $\beta$  mediated ECM remodeling during optic fissure fusion. For functional analyses, we switched model systems and made use of zebrafish. We found TGF $\beta$  ligands expressed in the developing zebrafish eye, and the ligand binding receptor in the optic fissure. Using a new in vivo TGF $\beta$  signaling reporter, we also found active TGF $\beta$  signaling in the margins of the optic fissure. We addressed the function of Cadherin 6 (*cdh6*), one of the TGF $\beta$  regulated genes, by knock down experiments in zebrafish and found a prominent coloboma phenotype. *Cdh6* was often found involved in processes of epithelial to mesenchymal transition (EMT), strengthening our hypothesis that an EMT-like process is also necessary for optic fissure fusion. Furthermore, we found Gremlin 2b (*grem2b*) and Follistatin a (*fsta*), homologs of TGF $\beta$  regulated bone morphogenetic protein (BMP) antagonists, expressed in the optic fissure margins, indicating the necessity of a localized inhibition of BMP signaling. Finally, we show that induced BMP expression is sufficient to inhibit optic fissure fusion. Together with our previous findings this indicates a dual role of BMP signaling during optic fissure closure.

Key words: optic fissure fusion, coloboma, TGF $\beta$ , BMP, ECM, Cdh6

## Introduction

The optic fissure is a transient gap in the ventral domain of the developing vertebrate eye. During a specific period of development, it is an entry route used by cells of the periocular mesenchyme and embryonic vasculature to enter the eye. However, it is necessary that the fissure is closed as development proceeds. A persisting fissure is termed coloboma. A coloboma can affect vision severely and is a frequent cause for blindness in children (Onwochei et al., 2000). Many genes and signaling pathways have been linked to coloboma formation (Graw, 2003, Westenskow et al., 2009, Bankhead et al., 2015, Chen et al., 2013, Cai et al., 2013, Miesfeld et al., 2015, Matt et al., 2008, Lupo et al., 2011, Lee et al., 2008, Heermann et al., 2015), resulting in a growing gene coloboma network (Gregory-Evans et al., 2004, 2013). Coloboma often is part of a multi organ syndrome, e.g. CHARGE syndrome or renal coloboma syndrome, linked to Pax2 and Chd7 respectively (Torres et al., 1996, Favor et al., 1996, Sanlaville and Verlores, 2007, Fletcher et al., 2006, Bower et al., 2011). Notably, the morphology of coloboma phenotypes is highly variable. Defects or alterations in some of these signaling pathways, for example, result in vast extended coloboma (Bankhead et al., 2015, Miesfeld et al., 2015), likely originating from morphogenetic defects. Such an early morphogenetic defect, resulting in coloboma, was demonstrated recently by a precocious arrest of the neuroretinal flow during optic cup formation, induced by ectopic expression of a BMP ligand (Heermann et al., 2015). Importantly, such massive coloboma phenotypes are different from colobomata resulting from a hampered fusion process of the optic fissure margins. Within these margins, the prospective neuroretina and the prospective retinal pigmented epithelium (RPE) share a basement membrane. With the onset of fissure fusion, the prospective neuroretina and RPE are separated and after that, reside on their own basement membrane respectively. This fusion of the two opposing fissure margins and the separation of the neuroretina from the RPE are demanding major structural remodeling. This includes the dissolution of the basement membrane within the margins (James et al., 2016), the loosening of cell-cell contacts in between prospective neuroretinal cells and RPE precursors and eventually establishment of new connections within the prospective neuroretina and RPE, respectively. N-cadherin and  $\alpha$ -catenin were shown to be important in this context (Masai et al., 2003, Chen et al., 2012). Although the overall

process that has to be executed is known quite well, only very little is known about how the actual fusion of the opposing optic fissure margins is achieved on a cellular and molecular basis. TGF $\beta$  is a well-known modifier of the extracellular matrix (ECM), in various processes during development and disease (Wu and Hill, 2016, Zhang et al., 2016, Thiery et al., 2009, Mercado-Pimentel and Runyan, 2007, Johansson et al., 2013). Here we address the role of TGF $\beta$  signaling for optic fissure fusion, making use of mouse (*Mus musculus*) and zebrafish (*Danio rerio*).

## **Results and Discussion**

### **Loss of TGF $\beta$ 2 results in coloboma**

In mouse, three TGF $\beta$  isoforms are encoded in the genome (TGF $\beta$ 1, 2 and 3). Targeted inactivation of TGF $\beta$ 2 results in several phenotypes, also affecting the eye (Sanford et al., 1997), e.g. a remaining primary vitreous, a Peters anomaly like phenotype and an altered neuroretinal layering. In addition to these phenotypes, we identified a persistent optic fissure in TGF $\beta$ 2 mutant embryos (Figure 1B, see A as control). TGF $\beta$ 2 dependent coloboma were first discovered in TGF $\beta$ 2/GDNF double mutants, (Rahhal, Heermann et al., 2009 unpublished observations) and subsequently also in TGF $\beta$ 2 single mutants (this study) but not in GDNF single mutants. Notably, no phenotype affecting eye development was described in any of the three independently generated GDNF mutant mouse lines (Pichel et al., 1996, Moore et al., 1996, Sanchez et al., 1996), though GDNF expression in the developing eye was documented (Hellmich et al., 1996). Therefore, the coloboma phenotype must be assigned to TGF $\beta$ 2 function. Notably, in the TGF $\beta$ 2 mutants the optic fissure margins were able to get in close proximity to each other, but ultimately failed to fuse and instead grew inwards (Figure 1B). TGF $\beta$  signaling is also necessary for the fusion of the palatal shelves during development (Sanford et al. 1997, Proetzel et al., 1995). There, the ligands TGF $\beta$ 2 and TGF $\beta$ 3 have slightly different functions. While in mice with targeted inactivation of TGF $\beta$ 2, the palatal shelves stay apart and a gap remains (Sanford et al., 1997), in TGF $\beta$ 3 mutant mice the palatal shelves touch, but do not fuse (Proetzel et al., 1995, Taya et al., 1999). The latter scenario is reminiscent of what we observed for optic fissure closure in TGF $\beta$ 2 mutant mouse embryos. The fissure margins meet, but do not fuse (Fig. 1B, see A as control).

### **Ocular expression of ECM genes during optic fissure fusion is TGF $\beta$ dependent**

Many genes have been linked to coloboma formation (Gregory-Evans et al., 2004, 2013), however, the structural changes occurring at the optic fissure margins during fusion are still not well understood. At the time when the margins of the optic fissure get in touch, structural changes inside these margins are essential to occur in order to allow their fusion. The basal membrane must be dissolved (James et al., 2016) and the epithelial structure must be loosened and re-established after fusion, involving the setup of new cell- cell and cell- matrix connections. We propose that this process occurs in an “epithelial to mesenchymal transition (EMT) like” process. Here, after an initial disassembly and consecutive fusion of the fissure margins, two new epithelia are established. These new epithelia, the neuroretina and the RPE, each contain a separate basal membrane. For this process to occur, the ECM has to be remodeled intensively. TGF $\beta$  signaling is well known for its ECM remodeling activity in various processes (Wu and Hill, 2016, Zhang et al., 2016, Thiery et al., 2009, Mercado-Pimentel and Runyan, 2007, Johansson et al., 2013). We thus addressed the potential transcriptional ECM regulation during optic fissure closure using our coloboma model. We quantified the levels of mRNAs from E13.5 embryonic eyes using Agilent microarray chips. To this end we compared RNA, harvested from eyes of wildtype as well as TGF $\beta$ 2/GDNF double mutant embryos, from which the coloboma phenotype was assigned to TGF $\beta$ 2 function only (see above). Henceforth the effects are termed TGF $\beta$  dependent. We processed the obtained microarray data, focusing on the genes significantly down-regulated. Performing a functional analysis of these genes we found as most prominent terms ECM, ECM organization, mesenchyme development, epithelium development or proteoglycan binding (Figure 1C). Next, we analyzed the expression levels of distinct ECM genes (Figure 1D). We found reduced expression of collagen genes Col1a1, Col6a1, Col5a1, Col7a1, Col8a2 and Col27a1 in combination with reduced levels of Elastin (Eln) and Epiphykan (Epyc), pointing towards reduced levels of fibrillogenesis in the extracellular space. Reduced levels of Cadherin 6, a factor often linked to EMT (Gugnoni et al., 2017, Clay and Halloran, 2014), strengthened our hypothesis of an EMT-like process and reduced levels of Fibronectin 1, indicated affected cell-matrix contacts. Furthermore, we found reduced levels of Keratocan (Kera), which was shown to be involved during TGF $\beta$ 2 regulated corneal development (Saika et al., 2001).

## **TGF $\beta$ ligands, the ligand binding receptor and TGF $\beta$ signaling in zebrafish optic cups**

Next, we wanted to functionally address identified target genes with respect to their necessity for optic fissure fusion. The zebrafish model is well-suited to address genes in a loss of function context. In addition, zebrafish embryos are easily accessible for analysis, due to their extrauterine development and partial transparency. To assure that a switch of model system to zebrafish is feasible, we first investigated the expression of TGF $\beta$  ligands and the TGF $\beta$  ligand binding receptor during zebrafish eye development. We found *tgfb2* expressed mainly in periocular tissue (Figure 1E) whereas *tgfb3* was expressed mainly in the developing lens (Figure 1F). The ligand binding receptor *tgfbrii* we found expressed at the site of the optic fissure (Figure 1G). The expression of TGF $\beta$  ligands in the eye and especially the TGF $\beta$  ligand binding receptor within the optic fissure margins suggests that TGF $\beta$  is also involved in zebrafish optic fissure fusion. We next became interested in the activity of TGF $\beta$  signaling. To assess the dynamics of activated TGF $\beta$  signaling *in vivo* during zebrafish development, we established a transcriptional TGF $\beta$  sensor in a stable transgenic line. The reporter system is based on Smads, the canonical transcription factors transducing TGF $\beta$  signaling (Heldin et al., 1997). We used repetitive Smad Binding Elements (SBE) from the human plasminogen activator inhibitor (PAI). Such a reporter has been intensively used for years as a luciferase assay to assess the amount and activity of TGF $\beta$  in cell culture (Dennler et al., 1998) and in mice (Lin et al., 2005). The repetitive SBEs were combined with a minimal promoter element to drive the expression of a membrane bound GFP (GFPcaax) (Figure S1A). We then established a stable transgenic zebrafish line. Activated TGF $\beta$  signaling can be observed during development, e.g. by domains in the forebrain region as well as the distal tail (Figure S1B). We validated the functionality of this reporter line employing the established TGF $\beta$  signaling inhibitor SB431542 (Inman et al., 2002, Laping et al., 2002). We observed a drastic reduction in reporter activity after treatment with SB431542 (Figure S1C). Next, we wanted to know whether TGF $\beta$  signaling was active in the optic fissure margins. We employed the TGF $\beta$  signaling reporter line in combination with a reporter for Shh signaling (analog to Schwend et al., 2010) to relate the fissure to the

optic stalk and performed *in vivo* time-lapse analyses. We found the TGF $\beta$  signaling reporter active within the optic fissure margins (Figure 1H and I see J for *shh* reporter activity only). Taken together our data indicate that TGF $\beta$  signaling is indeed active in the optic fissure margins of the zebrafish.

### **Cadherin 6 is essential for optic fissure fusion**

Next, we aimed at addressing the functional implications of the TGF $\beta$  regulated ECM genes during optic fissure fusion in zebrafish. Among the set of identified TGF $\beta$  regulated target genes, we found *Cdh6*. *Cdh6* was shown to be involved in processes of epithelial to mesenchymal transition (EMT) in development and disease (Gugnoni et al., 2017, Clay and Halloran, 2014, Sancisi et al., 2013) and was identified to be TGF $\beta$  dependent in thyroid cancer (Sancisi et al., 2013). During EMT, epithelialized cells exit the united cell structure and obtain mesenchymal features. We hypothesize that a part of the optic fissure fusion program is EMT-like, in which the basement membrane is degraded (James et al., 2016) and the cells of the optic fissure margins establish the contact between the margins (Eckert et al., in preparation). However, the process is somewhat reversed consecutively, because soon after the fusion is established, two separated epithelia, residing on an own basement membrane respectively, are generated, the neuroretina and the RPE. We found *cdh6* expressed within the optic fissure margins (Figure 2A-C). We subsequently made use of a Morpholino oligonucleotide (MO) induced knock down approach using established MO sequences (Liu et al., 2008, Kubota et al., 2007).

By screening with a stereomicroscope, we found that MO induced knockdown of *cdh6* caused coloboma in 31.6% (11.5ng of MO1) to 50.6% (4.5ng of MO2) of injected embryos (Figure 2J-L, M-O, Table, see 3D-I as control). Additional 20-32.9% of morpholino injected embryos showed an abnormally pigmented ventral retina, possibly indicating coloboma. 25.3% of *cdh6* MO1 injected animals showed severe defects of gross morphology and the eyes. Embryos injected with a control MO as well as uninjected animals only sporadically showed abnormal pigmentation or severe defects. Optical sections performed by confocal imaging of embryonic eyes with a nuclear staining confirmed the persistence of the optic fissure in *cdh6* morphants (Figure 2L, O). We also observed, in accordance with previous findings (Liu et al.,

2008), that *cdh6* morphant eyes are reduced in size and show delayed and defective retinal differentiation.

### **TGF $\beta$ mediated BMP antagonism during optic fissure closure**

It is well-established that BMP4 in cooperation with Vax2 is important for the definition of cellular identities along the dorsal ventral axis within the vertebrate eye (Koshiba-Takeuchi et al., 2000, Sasagawa et al., 2002, Mui et al., 2005, Behesti et al., 2006). In line with these data we found *bmp4* expressed dorsally and *vax2* expressed ventrally within the zebrafish optic cup (Figure 3A and B). Notably, BMP signaling is also important for other aspects of eye development, like the optic fissure generation (Morcillo et al., 2006) and the optic cup formation itself (Heermann et al., 2015). In the latter study, it was shown that an inhibition of BMP signaling is crucial for a bilateral neuroepithelial flow to occur over the distal rim of the developing optic cup. This BMP signaling inhibition is achieved by the BMP antagonist Follistatin a (*fsta*). We found two antagonists for BMP signaling, Follistatin and Gremlin 1, transcriptionally down-regulated in our murine coloboma model (Figure 3C). Furthermore, we found homologous genes (*grem2b* and *fsta*) expressed in the optic fissure margins of zebrafish (Figure 3D and E). BMP4 is a secreted ligand and can potentially diffuse and act over extended distances. The expression of the two BMP antagonists in the optic fissure hints at a functional requirement to locally suppress BMP activity in this domain. Above we showed that TGF $\beta$  is relevant for ECM remodeling during optic fissure fusion and overall TGF $\beta$  signaling is well-known for its ECM remodeling activity in various processes (Wu and Hill, 2016, Zhang et al., 2016, Thiery et al., 2009, Mercado-Pimentel and Runyan, 2007, Johansson et al., 2013). Notably, BMP signaling seems to counteract these TGF $\beta$  induced changes often (Izumi et al., 2006, Zeisberg et al., 2003, Wang and Hirschberg, 2003, 2004). We propose that TGF $\beta$  induced local BMP antagonism is unleashing the ECM remodeling capacity of TGF $\beta$  (Figure 4F, scheme). This concept is new for optic fissure fusion, however, was shown to be accurate in the context of glaucoma (Zode et al., 2009). The BMP antagonist Gremlin has been linked to cleft lips in humans (Al Chawa et al., 2014) indicating that the level of BMP signaling is also tightly controlled during fusion processes there. We suggest that the combined expression of two BMP antagonists is important to provide robustness to the system. BMP antagonists are



often expressed redundantly (Khokha et al., 2005, Eggen and Hemmati-Brivanlou 2001, Stottmann et al., 2001) pointing at the importance of their function. According to this it is not surprising that the loss of a single BMP antagonist does not result in coloboma (Grem1 knock out, not shown).

We next wanted to functionally test our hypothesis, that localized BMP inhibition in the optic fissure margins is necessary for TGF $\beta$  induced ECM remodeling and consecutive optic fissure fusion. To this end, we generated a transgenic line allowing for heat shock inducible *bmp4* expression (*tg(hsp:bmp4 cmlc2:GFP)*). With the help of this transgenic line we aimed at an oversaturation of the BMP antagonists and test whether or not this affects optic fissure fusion. Since the morphogenesis of the optic cup is dependent on BMP antagonism (Heermann et al., 2015), the timing of the heat shock induced expression of *bmp4* was critical. Thus, we first tested the outcome of heat shock induced *bmp4* expression at different successive stages of development (Figure S2, Figure 4). Induced expression at 21hpf and 22hpf resulted in a vast coloboma phenotype (Figure S2 A-A'' and B-B'', see D-D'' and E-E'' as control), well in line with the coloboma observed in our previous analyses (Heermann et al., 2015). This indicates that the transgenic line is functional but it also indicates that the onset of induction was too early and was affecting optic cup morphogenesis. The induced expression of *bmp4* at 23hpf resulted in a milder coloboma phenotype, with less affected cup morphogenesis (Figure S2 C-C'', see F-F'' as control). Notably, the resulting coloboma phenotype from induced *bmp4* expression at 24hpf, 25hpf and 26hpf was comparable, not showing defects in optic cup morphogenesis (Figure 4 A-C'', see D-H'' as control). According to our hypothesis (Figure 3F, scheme), active BMP signaling would suppress TGF $\beta$  induced structural remodeling within the optic fissure margins. In order to test this hypothesis further, we investigated *cdh6* expression in control embryos and heat shock induced *bmp4* expressing embryos. Indeed, the *bmp4* expression resulted in reduced levels of *cdh6* within the zebrafish eye (Figure 4 I, J, see K, L as control), indicating that our hypothesis is accurate.

## Conclusion

In this study, we present evidence for a role of TGF $\beta$  signaling in optic fissure fusion by ECM remodeling, functionally involving *cdh6*. Our data further indicate a requirement of local inhibition of BMP signaling within the optic fissure margins

during this process. This is facilitated by the TGF $\beta$  dependent induction of BMP antagonists in the margins of the optic fissure.

## **Experimental Procedures**

### **Zebrafish husbandry**

Zebrafish (*Danio rerio*) were kept as closed stocks in accordance with local animal welfare law. The facility is under supervision of the local representative of the animal welfare agency. The fish were maintained in a constant recirculating system at 28°C on a 12h light/12h dark cycle. Fish lines used in this study were created in the AB wild type strain.

### **Gene knock down**

We used three different Morpholino oligonucleotides (Gene Tools Llc) with 3'-fluorescein labels. A standard control MO (5'-CCT CTT ACC TCA GTT ACA ATT TAT A-3'), *cdh6* MO1 (5'-AAG AAG TAC AAT CCA AGT CCT CAT C-3'), and *cdh6* MO2 (5'-TCC GCT CTT AGG GTG TCT TAC AGG G-3', both Kubota et al., 2007; Liu et al., 2008). MOs were microinjected into the cytoplasm of zebrafish zygotes at concentrations of 750µM (control MO and *cdh6* MO1) and 500µM (*cdh6* MO2). The desired injection volume was calibrated using a slide with 0.01mm scale (Bresser, Germany). The phenotype of morphants was assessed at 3dpf using a Nikon SMZ18 stereomicroscope, followed by fixation in 4%PFA for further analysis.

### **Heat shocks and controls**

*tg(hsp70:bmp4, cmc2:eGFP)* eggs were kept in a petri dish at 28°C after fertilization. To induce *bmp4* expression, 21-26hpf embryos were transferred to a 1.5ml reaction tube and incubated for 1h at 37°C in a heating block. Afterwards, they were returned to a dish at 28°C. Embryos were fixed with 4%PFA at 30hpf for in situ hybridization and at 3dpf for morphological analysis.

We used *tg(hsp70:bmp4, cmc2:eGFP)* embryos which were not heat shocked as controls, as well as heat shocked wild type siblings from the same clutch of eggs.

### **Transgenic zebrafish**

Plasmid DNA containing Smad binding elements (SBE) in combination with a minimal promoter, were kindly provided by Peter tenDijke ((CAGA)<sub>12</sub> MLP Luc). Here repetitive SBEs derived from the promoter of the human plasminogen activator inhibitor gene (Dennler et al., 1998) were used to drive a luciferase gene.

We cloned the SBEs with the minimal promoter into a Gateway 5' entry vector (Invitrogen). A multisite Gateway reaction (Kwan et al., 2007) was subsequently performed resulting in an SBE driven GFPcaax construct (SBE:GFPcaax). A Zebrafish line was generated with SB (sleeping beauty) transgenesis according to Kirchmaier et al (Kirchmaier et al., 2013). Shh reporter zebrafish were generated according to Schwend et al (Schwend et al., 2010). The plasmid was kindly provided by Sara Ahlgren.

We assembled the expression construct for *Tg(hsp70:bmp4, cmlc2:eGFP)* in a Gateway reaction, using a Tol2 destination vector including *cmlc2:eGFP* (Kwan et al., 2007), a 5'Entry vector containing the *hsp70* promoter, a pENTR D-TOPO (ThermoFisher Scientific) vector containing the CDS of *bmp4* (Heermann et al., 2015) and a 3'Entry vector with a polyadenylation site (Kwan et al., 2007). The construct (10ng/ $\mu$ l) was injected into wild type zebrafish zygotes together with Tol2 transposase mRNA (7ng/ $\mu$ l). Embryos with strong GFP expression in the heart were selected as founders. Lines were kept in closed stocks and validated in every generation.

### **Drug treatments**

Zebrafish embryos were treated with SB431542 (8 $\mu$ l/ml) to inhibit TGF $\beta$  mediated signaling. The substance was dissolved in DMSO (10 mmol stock). Controls were treated with equally concentrated DMSO without the inhibitor.

### **Microscopy**

Signaling reporter fish were imaged with a Leica SP5 setup, samples mounted in glass bottom dishes (MaTek). For time-lapse imaging embryos were embedded in 1% low melting agarose covered with zebrafish medium and anesthetized with tricain. Left and right eyes were used and oriented to fit the standard views. A stereomicroscope (Olympus/ Nikon) was used for recording brightfield and fluorescent images of TGF $\beta$  signaling reporter fish. Whole mount in situ hybridizations were recorded with a stereomicroscope (Olympus) as well as an upright microscope (Zeiss). For time-lapse imaging embryos were embedded in 1% low melting agarose covered with zebrafish medium and anesthetized with tricain. Left and right eyes were used and oriented to fit the standard views.

### **Whole mount in situ hybridization**

Whole mount in situ hybridizations were performed according to Quiring et al. (Quiring et al., 2004).

### **Mice**

For this study TGFb2<sup>+/-</sup> (Sanford et al., 1997) and GDNF<sup>+/-</sup> (Pichel et al., 1996) mice were used for breeding. Timed matings were performed overnight and the day on which a vaginal plug was visible in the morning was considered as day 0.5. Analyses were restricted to embryonic stages because of perinatal lethality of the individual mutants. For analysis of embryonic tissue, the mother was sacrificed and the embryos were collected by caesarean section. All of the experiments were performed in agreement with the ethical committees. Genotyping was performed according to Rahhal, Heermann et al., 2009.

### **Histological analysis**

Tissue was processed for paraffin sectioning. Frontal sections of control and TGFb2<sup>-/-</sup> embryos were performed and stained with haematoxylin and eosin.

### **Microarray data**

RNA was extracted from whole eyes of E13.5 embryos (controls and TGFb2<sup>-/-</sup> (GDNF<sup>-/-</sup>) respectively). RNA was reverse transcribed, amplified and loaded on Agilent one-color microarray chips. Experiments were performed in triplicates.

Further analysis was performed using R (R Core Team, 2014) and the bioconductor packages *Agi4x44PreProcess*, *limma* and *mgug4122a.db* as annotation database. For background correction we used the following parameters: `BGmethod = "half"`, `NORM-method = "quantile"`, `foreground = "MeanSignal"`, `background = "BGMedianSignal"` and `offset = 50`. The probes were filtered using the recommended thresholds and afterwards the replicated non-control probes were summarized. Then the method *lmFit* was used to fit a linear model on the arrays. Finally, the differential expression statistics were computed using the methods *eBayes*. Next only those genes with fold change higher than 1.5 were considered, then a multiple comparison correction was performed on the p-values using the BH (Benjamini & Hochberg) method. The genes with corrected p-value lower than 0.05 were defined as significantly differentially expressed genes.

### **Functional analysis of gene sets**

We used the tool gProfiler (J. Reimand et al., 2016) (<http://biit.cs.ut.ee/gprofiler/>) version 6.7 to find enriched terms on the set of significantly down-regulated genes from the mouse arrays. We provided the official gene symbol of these genes as input and used the default set of databases.

### **Acknowledgements**

We want to thank Rolf Zeller for making Gremlin KO mice available as well as for scientific discussion. We also want to thank Gabriela Salinas-Riester and the TAL of the University Göttingen. We also thank Sara Ahlgren for generously making the shh-reporter construct available and Peter tenDijke for the luciferase construct on which our new TGF $\beta$  reporter zebrafish is based. We thank Lea Schertel and Lidia Koschny for great technical assistance and Burkhard Höckendorf for constructive input and help generating the TGF $\beta$  reporter line and Hannes Voßfeld for assistance with the mouse mutants. The project was in part funded by the Deutsche Forschungsgemeinschaft (project: Molecular mechanisms regulating optic fissure closure)

### **Author contributions:**

MK: experiments, JM: analysis of Microarray data, PE: experiments, ER and BR: TGF $\beta$  KO mouse acquisition, AZ: sent fixed embryonic heads (Grem1 KO and controls) for analyses, KK and JW: helped conceiving the study and acquired funding, SH: conceived the study, experiments, wrote the manuscript

The authors declare that they do not have a conflict of interest.

### **References**

Al Chawa, Taofik, Kerstin U Ludwig, Heide Fier, Bernd Pöttsch, Rudolf H Reich, Gül Schmidt, Bert Braumann, u. a. „Nonsyndromic Cleft Lip with or without Cleft Palate: Increased Burden of Rare Variants within Gremlin-1, a Component of the Bone Morphogenetic Protein 4 Pathway“. *Birth Defects Research. Part A, Clinical and Molecular Teratology*, 7. April 2014. doi:10.1002/bdra.23244.

- Bankhead, Elizabeth J., Mary P. Colasanto, Kayla M. Dyorich, Milan Jamrich, L. Charles Murtaugh, und Sabine Fuhrmann. „Multiple Requirements of the Focal Dermal Hypoplasia Gene Porcupine during Ocular Morphogenesis“. *The American Journal of Pathology* 185, Nr. 1 (Januar 2015): 197–213. doi:10.1016/j.ajpath.2014.09.002.
- Behesti, Hourinaz, James K L Holt, und Jane C Sowden. „The Level of BMP4 Signaling Is Critical for the Regulation of Distinct T-Box Gene Expression Domains and Growth along the Dorso-Ventral Axis of the Optic Cup“. *BMC Developmental Biology* 6 (2006): 62. doi:10.1186/1471-213X-6-62.
- Bower, Matthew, Rémi Salomon, Judith Allanson, Corinne Antignac, Francesco Benedicenti, Elisa Benetti, Gil Binenbaum, u. a. „Update of PAX2 Mutations in Renal Coloboma Syndrome and Establishment of a Locus-Specific Database“. *Human Mutation* 33, Nr. 3 (1. März 2012): 457–66. doi:10.1002/humu.22020.
- Cai, Zhigang, Chenqi Tao, Hongge Li, Raj Ladher, Noriko Gotoh, Gen-Sheng Feng, Fen Wang, und Xin Zhang. „Deficient FGF Signaling Causes Optic Nerve Dysgenesis and Ocular Coloboma“. *Development (Cambridge, England)* 140, Nr. 13 (Juli 2013): 2711–23. doi:10.1242/dev.089987.
- Chen, Shuyi, Brandy Lewis, Andrea Moran, und Ting Xie. „Cadherin-mediated cell adhesion is critical for the closing of the mouse optic fissure“. *PloS one* 7, Nr. 12 (2012): e51705. doi:10.1371/journal.pone.0051705.
- Chen, Shuyi, Hua Li, Karin Zueckert-Gaudenz, Ariel Paulson, Fengli Guo, Rhonda Trimble, Allison Peak, u. a. „Defective FGF signaling causes coloboma formation and disrupts retinal neurogenesis“. *Cell research*, 13. November 2012. doi:10.1038/cr.2012.150.
- Clay, Matthew R., und Mary C. Halloran. „Cadherin 6 Promotes Neural Crest Cell Detachment via F-Actin Regulation and Influences Active Rho Distribution during Epithelial-to-Mesenchymal Transition“. *Development (Cambridge, England)* 141, Nr. 12 (Juni 2014): 2506–15. doi:10.1242/dev.105551.
- Dennler, S, S Itoh, D Vivien, P ten Dijke, S Huet, und J M Gauthier. „Direct Binding of Smad3 and Smad4 to Critical TGF Beta-Inducible Elements in the Promoter of Human Plasminogen Activator Inhibitor-Type 1 Gene“. *The EMBO Journal* 17, Nr. 11 (1. Juni 1998): 3091–3100. doi:10.1093/emboj/17.11.3091.
- Eggen, Bart JL, und Ali Hemmati-Brivanlou. „BMP Antagonists and Neural Induction“. In *eLS*. John Wiley & Sons, Ltd, 2001. <http://onlinelibrary.wiley.com/doi/10.1038/npg.els.0000805/abstract>.
- Favor, J., R. Sandulache, A. Neuhäuser-Klaus, W. Pretsch, B. Chatterjee, E. Senft, W. Wurst, u. a. „The Mouse Pax2(1Neu) Mutation Is Identical to a Human PAX2 Mutation in a Family with Renal-Coloboma Syndrome and Results in Developmental Defects of the Brain, Ear, Eye, and Kidney“. *Proceedings of the National Academy of Sciences of the United States of America* 93, Nr. 24 (26. November 1996): 13870–75.
- Fletcher, Jeffery, Min Hu, Yemima Berman, Felicity Collins, John Grigg, Margot McIver, Harald Jüppner, und Stephen I. Alexander. „Multicystic Dysplastic Kidney and Variable Phenotype in a Family with a Novel Deletion Mutation of PAX2“. *Journal of the American Society of Nephrology* 16, Nr. 9 (9. Januar 2005): 2754–61. doi:10.1681/ASN.2005030239.
- Graw, Jochen. „The Genetic and Molecular Basis of Congenital Eye Defects“. *Nature Reviews Genetics* 4, Nr. 11 (November 2003): 876–88. doi:10.1038/nrg1202.
- Gregory-Evans, C. Y., M. J. Williams, S. Halford, und K. Gregory-Evans. „Ocular Coloboma: A Reassessment in the Age of Molecular Neuroscience“. *Journal of*

- Medical Genetics* 41, Nr. 12 (12. Januar 2004): 881–91.  
doi:10.1136/jmg.2004.025494.
- Gregory-Evans, Cheryl Y., Valerie A. Wallace, und Kevin Gregory-Evans. „Gene networks: Dissecting pathways in retinal development and disease“. *Progress in Retinal and Eye Research* 33 (März 2013): 40–66.  
doi:10.1016/j.preteyeres.2012.10.003.
- Gugnoni, M., V. Sancisi, G. Gandolfi, G. Manzotti, M. Ragazzi, D. Giordano, I. Tamagnini, u. a. „Cadherin-6 Promotes EMT and Cancer Metastasis by Restraining Autophagy“. *Oncogene* 36, Nr. 5 (2. Februar 2017): 667–77.  
doi:10.1038/onc.2016.237.
- Heermann, Stephan, Lucas Schütz, Steffen Lemke, Kerstin Krieglstein, and Joachim Wittbrodt. 2015. “Eye Morphogenesis Driven by Epithelial Flow into the Optic Cup Facilitated by Modulation of Bone Morphogenetic Protein.” *eLife* 4.  
doi:10.7554/eLife.05216.
- Heldin, Carl-Henrik, Kohei Miyazono, und Peter ten Dijke. „TGF- $\beta$  Signalling from Cell Membrane to Nucleus through SMAD Proteins“. *Nature* 390, Nr. 6659 (4. Dezember 1997): 465–71. doi:10.1038/37284.
- Hellmich, H. L., L. Kos, E. S. Cho, K. A. Mahon, und A. Zimmer. „Embryonic Expression of Glial Cell-Line Derived Neurotrophic Factor (GDNF) Suggests Multiple Developmental Roles in Neural Differentiation and Epithelial-Mesenchymal Interactions“. *Mechanisms of Development* 54, Nr. 1 (Januar 1996): 95–105.
- Inman, Gareth J, Francisco J Nicolás, James F Callahan, John D Harling, Laramie M Gaster, Alastair D Reith, Nicholas J Laping, und Caroline S Hill. „SB-431542 Is a Potent and Specific Inhibitor of Transforming Growth Factor-Beta Superfamily Type I Activin Receptor-like Kinase (ALK) Receptors ALK4, ALK5, and ALK7“. *Molecular Pharmacology* 62, Nr. 1 (Juli 2002): 65–74.
- Izumi, Nobuhiro, Shinjiro Mizuguchi, Yutaka Inagaki, Shizuya Saika, Norifumi Kawada, Yuji Nakajima, Kiyotoshi Inoue, Shigefumi Suehiro, Scott L. Friedman, und Kazuo Ikeda. „BMP-7 Opposes TGF-beta1-Mediated Collagen Induction in Mouse Pulmonary Myofibroblasts through Id2“. *American Journal of Physiology. Lung Cellular and Molecular Physiology* 290, Nr. 1 (Januar 2006): L120-126. doi:10.1152/ajplung.00171.2005.
- James, Andrea, Chanjae Lee, Andre M. Williams, Krista Angileri, Kira L. Lathrop, und Jeffrey M. Gross. „The Hyaloid Vasculature Facilitates Basement Membrane Breakdown during Choroid Fissure Closure in the Zebrafish Eye“. *Developmental Biology* 419, Nr. 2 (15. November 2016): 262–72.  
doi:10.1016/j.ydbio.2016.09.008.
- Johansson, J., T. Berg, E. Kurzejska, M.-F. Pang, V. Tabor, M. Jansson, P. Roswall, u. a. „MiR-155-Mediated Loss of C/EBP $\beta$  Shifts the TGF- $\beta$  Response from Growth Inhibition to Epithelial-Mesenchymal Transition, Invasion and Metastasis in Breast Cancer“. *Oncogene* 32, Nr. 50 (12. Dezember 2013): 5614–24. doi:10.1038/onc.2013.322.
- Khokha, Mustafa K, Joanna Yeh, Timothy C Grammer, und Richard M Harland. „Depletion of Three BMP Antagonists from Spemann’s Organizer Leads to a Catastrophic Loss of Dorsal Structures“. *Developmental Cell* 8, Nr. 3 (März 2005): 401–11. doi:10.1016/j.devcel.2005.01.013.
- Kirchmaier, Stephan, Burkhard Höckendorf, Eva Katharina Möller, Dorothee Bornhorst, Francois Spitz, und Joachim Wittbrodt. „Efficient Site-Specific Transgenesis and Enhancer Activity Tests in Medaka Using PhiC31 Integrase“.



- Development (Cambridge, England)* 140, Nr. 20 (Oktober 2013): 4287–95.  
doi:10.1242/dev.096081.
- Koshiba-Takeuchi, K, J K Takeuchi, K Matsumoto, T Momose, K Uno, V Hoepker, K Ogura, u. a. „Tbx5 and the Retinotectum Projection“. *Science (New York, N.Y.)* 287, Nr. 5450 (7. Januar 2000): 134–37.
- Kwan, Kristen M., Esther Fujimoto, Clemens Grabher, Benjamin D. Mangum, Melissa E. Hardy, Douglas S. Campbell, John M. Parant, H. Joseph Yost, John P. Kanki, und Chi-Bin Chien. „The Tol2kit: A Multisite Gateway-Based Construction Kit for Tol2 Transposon Transgenesis Constructs“. *Developmental Dynamics* 236, Nr. 11 (1. November 2007): 3088–99. doi:10.1002/dvdy.21343.
- Laping, N. J., E. Grygielko, A. Mathur, S. Butter, J. Bomberger, C. Tweed, W. Martin, u. a. „Inhibition of Transforming Growth Factor (TGF)-beta1-Induced Extracellular Matrix with a Novel Inhibitor of the TGF-Beta Type I Receptor Kinase Activity: SB-431542“. *Molecular Pharmacology* 62, Nr. 1 (Juli 2002): 58–64.
- Lee, Jiwoon, Jason R. Willer, Gregory B. Willer, Kierann Smith, Ronald G. Gregg, und Jeffrey M. Gross. „Zebrafish blowout provides genetic evidence for Patched1 mediated negative regulation of Hedgehog signaling within the proximal optic vesicle of the vertebrate eye“. *Developmental biology* 319, Nr. 1 (1. Juli 2008): 10–22. doi:10.1016/j.ydbio.2008.03.035.
- Lin, Amy H, Jian Luo, Lauren H Mondschein, Peter ten Dijke, Denis Vivien, Christopher H Contag, und Tony Wyss-Coray. „Global Analysis of Smad2/3-Dependent TGF-Beta Signaling in Living Mice Reveals Prominent Tissue-Specific Responses to Injury“. *Journal of Immunology (Baltimore, Md.: 1950)* 175, Nr. 1 (1. Juli 2005): 547–54.
- Liu, Qin, Richard Londrville, James A. Marrs, Amy L. Wilson, Thomas Mbimba, Tohru Murakami, Fumitaka Kubota, Weiping Zheng, und David G. Fatkins. „Cadherin-6 Function in Zebrafish Retinal Development“. *Developmental Neurobiology* 68, Nr. 8 (Juli 2008): 1107–22. doi:10.1002/dneu.20646.
- Lupo, Giuseppe, Gaia Gestri, Matthew O’Brien, Ross M. Denton, Roshantha A. S. Chandraratna, Steven V. Ley, William A. Harris, und Stephen W. Wilson. „Retinoic Acid Receptor Signaling Regulates Choroid Fissure Closure through Independent Mechanisms in the Ventral Optic Cup and Periocular Mesenchyme“. *Proceedings of the National Academy of Sciences of the United States of America* 108, Nr. 21 (24. Mai 2011): 8698–8703.  
doi:10.1073/pnas.1103802108.
- Masai, Ichiro, Zsolt Lele, Masahiro Yamaguchi, Atsuko Komori, Asuka Nakata, Yuko Nishiwaki, Hironori Wada, u. a. „N-Cadherin Mediates Retinal Lamination, Maintenance of Forebrain Compartments and Patterning of Retinal Neurites“. *Development (Cambridge, England)* 130, Nr. 11 (Juni 2003): 2479–94.
- Matt, Nicolas, Norbert B. Ghyselinck, Isabelle Pellerin, und Valérie Dupé. „Impairing Retinoic Acid Signalling in the Neural Crest Cells Is Sufficient to Alter Entire Eye Morphogenesis“. *Developmental Biology* 320, Nr. 1 (1. August 2008): 140–48. doi:10.1016/j.ydbio.2008.04.039.
- Mercado-Pimentel, Melania E., und Raymond B. Runyan. „Multiple Transforming Growth Factor-Beta Isoforms and Receptors Function during Epithelial-Mesenchymal Cell Transformation in the Embryonic Heart“. *Cells, Tissues, Organs* 185, Nr. 1–3 (2007): 146–56. doi:10.1159/000101315.

- Miesfeld, Joel B., Gaia Gestri, Brian S. Clark, Michael A. Flinn, Richard J. Poole, Jason R. Bader, Joseph C. Besharse, Stephen W. Wilson, und Brian A. Link. „Yap and Taz Regulate Retinal Pigment Epithelial Cell Fate“. *Development (Cambridge, England)* 142, Nr. 17 (1. September 2015): 3021–32. doi:10.1242/dev.119008.
- Moore, M. W., R. D. Klein, I. Fariñas, H. Sauer, M. Armanini, H. Phillips, L. F. Reichardt, A. M. Ryan, K. Carver-Moore, und A. Rosenthal. „Renal and Neuronal Abnormalities in Mice Lacking GDNF“. *Nature* 382, Nr. 6586 (4. Juli 1996): 76–79. doi:10.1038/382076a0.
- Morcillo, Julian, Juan Ramon Martínez-Morales, Françoise Trousse, Yasmin Fermin, Jane C Sowden, und Paola Bovolenta. „Proper Patterning of the Optic Fissure Requires the Sequential Activity of BMP7 and SHH“. *Development (Cambridge, England)* 133, Nr. 16 (August 2006): 3179–90. doi:10.1242/dev.02493.
- Mui, Stina H, Jin Woo Kim, Greg Lemke, und Stefano Bertuzzi. „Vax Genes Ventralize the Embryonic Eye“. *Genes & Development* 19, Nr. 10 (15. Mai 2005): 1249–59. doi:10.1101/gad.1276605.
- Onwochei, B. C., J. W. Simon, J. B. Bateman, K. C. Couture, und E. Mir. „Ocular Colobomata“. *Survey of Ophthalmology* 45, Nr. 3 (Dezember 2000): 175–94.
- Pichel, J G, L Shen, H Z Sheng, A C Granholm, J Drago, A Grinberg, E J Lee, u. a. „Defects in enteric innervation and kidney development in mice lacking GDNF“. *Nature* 382, Nr. 6586 (4. Juli 1996): 73–76. doi:10.1038/382073a0.
- Proetzel, G, S A Pawlowski, M V Wiles, M Yin, G P Boivin, P N Howles, J Ding, M W Ferguson, und T Doetschman. „Transforming Growth Factor-Beta 3 Is Required for Secondary Palate Fusion“. *Nature Genetics* 11, Nr. 4 (Dezember 1995): 409–14. doi:10.1038/ng1295-409.
- Quiring, Rebecca, Beate Wittbrodt, Thorsten Henrich, Mirana Ramialison, Carola Burgdorf, Hans Lehrach, und Joachim Wittbrodt. „Large-Scale Expression Screening by Automated Whole-Mount in Situ Hybridization“. *Mechanisms of Development* 121, Nr. 7–8 (Juli 2004): 971–76. doi:10.1016/j.mod.2004.03.031.
- R Core Team. „A language and environment for statistical computing. R Foundation for Statistical Computing“, o. J.
- Rahhal, Belal, Stephan Heermann, Anika Ferdinand, Joachim Rosenbusch, Michael Rickmann, und Kerstin Krieglstein. „In Vivo Requirement of TGF-Beta/GDNF Cooperativity in Mouse Development: Focus on the Neurotrophic Hypothesis“. *International Journal of Developmental Neuroscience: The Official Journal of the International Society for Developmental Neuroscience* 27, Nr. 1 (Februar 2009): 97–102. doi:10.1016/j.ijdevneu.2008.08.003.
- Reimand, Jüri, Tambet Arak, Priit Adler, Liis Kolberg, Sulev Reisberg, Hedi Peterson, und Jaak Vilo. „g:Profiler—a Web Server for Functional Interpretation of Gene Lists (2016 Update)“. *Nucleic Acids Research* 44, Nr. W1 (8. Juli 2016): W83–89. doi:10.1093/nar/gkw199.
- Saika, S., S. Saika, C. Y. Liu, M. Azhar, L. P. Sanford, T. Doetschman, R. L. Gendron, C. W. Kao, und W. W. Kao. „TGFbeta2 in Corneal Morphogenesis during Mouse Embryonic Development“. *Developmental Biology* 240, Nr. 2 (15. Dezember 2001): 419–32. doi:10.1006/dbio.2001.0480.
- Sánchez, M. P., I. Silos-Santiago, J. Frisé, B. He, S. A. Lira, und M. Barbacid. „Renal Agenesis and the Absence of Enteric Neurons in Mice Lacking GDNF“. *Nature* 382, Nr. 6586 (4. Juli 1996): 70–73. doi:10.1038/382070a0.
- Sancisi, Valentina, Greta Gandolfi, Moira Ragazzi, Davide Nicoli, Ione Tamagnini, Simonetta Piana, und Alessia Ciarrocchi. „Cadherin 6 Is a New RUNX2 Target

- in TGF- $\beta$  Signalling Pathway“. *PLoS One* 8, Nr. 9 (2013): e75489.  
doi:10.1371/journal.pone.0075489.
- Sanford, L. P., I. Ormsby, A. C. Gittenberger-de Groot, H. Sariola, R. Friedman, G. P. Boivin, E. L. Cardell, and T. Doetschman. „TGFbeta2 Knockout Mice Have Multiple Developmental Defects That Are Non-Overlapping with Other TGFbeta Knockout Phenotypes“. *Development (Cambridge, England)* 124, Nr. 13 (Juli 1997): 2659–70.
- Sanlaville, Damien, und Alain Verloes. „CHARGE Syndrome: An Update“. *European Journal of Human Genetics: EJHG* 15, Nr. 4 (April 2007): 389–99.  
doi:10.1038/sj.ejhg.5201778.
- Sasagawa, Satoru, Takashi Takabatake, Yuka Takabatake, Tatsuo Muramatsu, und Kazuhito Takeshima. „Axes Establishment during Eye Morphogenesis in *Xenopus* by Coordinate and Antagonistic Actions of BMP4, Shh, and RA“. *Genesis (New York, N.Y.: 2000)* 33, Nr. 2 (Juni 2002): 86–96.  
doi:10.1002/gene.10095.
- Schwend, Tyler, Evyn J. Loucks, und Sara C. Ahlgren. „Visualization of Gli Activity in Craniofacial Tissues of Hedgehog-Pathway Reporter Transgenic Zebrafish“. *PLoS One* 5, Nr. 12 (21. Dezember 2010): e14396.  
doi:10.1371/journal.pone.0014396.
- Stottmann, R W, R M Anderson, und J Klingensmith. „The BMP Antagonists Chordin and Noggin Have Essential but Redundant Roles in Mouse Mandibular Outgrowth“. *Developmental Biology* 240, Nr. 2 (15. Dezember 2001): 457–73.  
doi:10.1006/dbio.2001.0479.
- Taya, Y, S O’Kane, und M W Ferguson. „Pathogenesis of Cleft Palate in TGF-beta3 Knockout Mice“. *Development (Cambridge, England)* 126, Nr. 17 (September 1999): 3869–79.
- Thiery, Jean Paul, Hervé Acloque, Ruby Y. J. Huang, und M. Angela Nieto. „Epithelial-Mesenchymal Transitions in Development and Disease“. *Cell* 139, Nr. 5 (25. November 2009): 871–90. doi:10.1016/j.cell.2009.11.007.
- Torres, M., E. Gómez-Pardo, und P. Gruss. „Pax2 Contributes to Inner Ear Patterning and Optic Nerve Trajectory“. *Development (Cambridge, England)* 122, Nr. 11 (November 1996): 3381–91.
- Wang, Shinong, und Raimund Hirschberg. „BMP7 Antagonizes TGF-Beta - Dependent Fibrogenesis in Mesangial Cells“. *American Journal of Physiology. Renal Physiology* 284, Nr. 5 (Mai 2003): F1006-1013.  
doi:10.1152/ajprenal.00382.2002.
- — — . „Bone Morphogenetic Protein-7 Signals Opposing Transforming Growth Factor Beta in Mesangial Cells“. *The Journal of Biological Chemistry* 279, Nr. 22 (28. Mai 2004): 23200–206. doi:10.1074/jbc.M311998200.
- Westenskow, Peter, Stefano Piccolo, und Sabine Fuhrmann. „Beta-Catenin Controls Differentiation of the Retinal Pigment Epithelium in the Mouse Optic Cup by Regulating Mitf and Otx2 Expression“. *Development (Cambridge, England)* 136, Nr. 15 (August 2009): 2505–10. doi:10.1242/dev.032136.
- Wu, Mary Y., und Caroline S. Hill. „TGF- $\beta$  Superfamily Signaling in Embryonic Development and Homeostasis“. *Developmental Cell* 16, Nr. 3 (17. März 2009): 329–43. doi:10.1016/j.devcel.2009.02.012.
- Zeisberg, Michael, Jun-ichi Hanai, Hikaru Sugimoto, Tadanori Mammoto, David Charytan, Frank Strutz, und Raghu Kalluri. „BMP-7 Counteracts TGF-beta1- Induced Epithelial-to-Mesenchymal Transition and Reverses Chronic Renal Injury“. *Nature Medicine* 9, Nr. 7 (Juli 2003): 964–68. doi:10.1038/nm888.

- Zhang, Jingyu, Xiao-Jun Tian, und Jianhua Xing. „Signal Transduction Pathways of EMT Induced by TGF- $\beta$ , SHH, and WNT and Their Crosstalks“. *Journal of Clinical Medicine* 5, Nr. 4 (2016). doi:10.3390/jcm5040041.
- Zode, Gulab S., Abbot F. Clark, und Robert J. Wordinger. „Bone Morphogenetic Protein 4 Inhibits TGF- $\beta$ 2 Stimulation of Extracellular Matrix Proteins in Optic Nerve Head Cells: Role of Gremlin in ECM Modulation“. *Glia* 57, Nr. 7 (Mai 2009): 755–66. doi:10.1002/glia.20803.

### Figure legends:

**Figure 1:** Loss of TGF $\beta$ 2 ligand results in coloboma, ECM remodeling is affected and TGF $\beta$  ligands and TGF $\beta$  signaling in the developing zebrafish eye

(A) Frontal section of a wildtype embryo (E18.5) as control (H&E staining). (B) Frontal section of a TGF $\beta$ 2 KO embryo (E18.5) (H&E staining). Note the persisting optic fissure (boxed). Importantly the fissure margins must have met, but grew inwards, rather than fusing. Scale bars represent 200 $\mu$ m. (C) Selected terms enriched in the set of down-regulated genes in TGF $\beta$ 2/GDNF KO microarray based on the analysis with the tool gProfiler. BP=Biological Process, CC=Cellular Component, MF=Molecular Function. SP\_PIR\_KEYWORDS=Swiss-Prot Protein Information Resource. (D) Level of misregulation for several ECM related genes represented as fold change (FC). Error bars represent the 95% confidence interval. (E) in-situ hybridization of *tgfb2* (30 hpf), frontal view. Note expression of *tgfb2* in the periorbital mesenchyme (arrows). (F) in-situ hybridization of *tgfb3* (30 hpf), lateral view. Note expression of *tgfb3* in the distal part of the developing lens. (G) in-situ hybridization of *tgfb $\beta$ II* (30 hpf), lateral view. Note expression of *tgfb $\beta$ II* in the optic fissure region (arrow). (H) combination of *in vivo* signaling for TGF $\beta$  (green) and Shh (red) split into the single reporter for TGF $\beta$  (I) and Shh (J). Note the active TGF $\beta$  signaling in the optic fissure margins (I, arrows).

**Figure 2:** Knockdown of *cdh6* causes coloboma in zebrafish.

(A, B) Whole mount in situ hybridization for *cdh6* in lateral (A) and dorsal perspective (B), please note the *cdh6* expression within the optic fissure (C) confocal image of *cdh6* whole mount in situ hybridization, (D, G, J, M) gross morphology of control embryos and morphants at 3dpf. (E, H, K, N) lateral view of the eyes of control embryos and morphants at 3dpf. *cdh6* morphants show coloboma, decreased eye size.

(F, I, L, O) whole-mount eyes of control embryos and morphants at 3dpf, stained with DAPI. In addition to coloboma, *cdh6* morphants also show disrupted retinal layering (O). scale bars represent 50 $\mu$ m, orientation: nasal to the left

**Figure 3:**

BMP antagonists are expressed in the optic fissure margins opposing the dorsally expressed BMP4, TGF $\beta$  interplay in optic fissure closure (scheme)

(A) in-situ hybridization of BMP4 (30 hpf), lateral view. Note the localized dorsal expression of *bmp4* (arrow) within the optic cup. (B) in-situ hybridization of *vax2* (30 hpf), lateral view. Note the localized ventral expression of *vax2* within the optic cup. (C) Expression analysis of gremlin and follistatin, both being BMP antagonists, revealed a decrease in TGF $\beta$ 2 KO (TGF $\beta$ 2/GDNF KO) as represented by the fold change (FC). Error bars represent the 95% confidence interval. Corrected p-value of control gene expression compared to KO for follistatin and gremlin, 1.2E-3 and 5.5E-3 respectively. (D) in-situ hybridization of *grem2b* (30 hpf), lateral view. Note expression of *grem2b* in the optic fissure margins (arrow). (E) in-situ hybridizations of *fsta* (30 hpf), lateral view. Note expression of *fsta* in the optic fissure margins (arrow) and the developing CMZ (arrowhead). (F) TGF $\beta$  is inducing the expression of BMP antagonists, expressed in the optic fissure margins. We propose that this local inhibition of BMP signaling unleashes the capacity of TGF $\beta$  to remodel the ECM, enabling optic fissure fusion.

**Figure 4:** *bmp4* inhibits optic fissure closure and decreases expression of TGF $\beta$ -regulated *cdh6*. (A-H) Gross morphology of (A-D) *tg(hsp70:bmp4, cmlc2:GFP)* embryos and (E-H) wild type clutch mates at 3dpf after heat shock at timepoints between 24 and 26hpf. (A'-H') lateral and (A''-H'') ventral views of the same embryos. (A'-C'') Transgene embryos with induced ubiquitous expression of *bmp4* exhibit coloboma and a lateral dislocation of the lens when expression was induced between 24 and 26hpf. (D'-H'') Uninduced transgene embryos and their wild type clutchmates do not develop this phenotype. (I-L) Whole mount in situ hybridization for *cdh6* in 30hpf embryos (prim-15). (I) Lateral and (J) dorsal view of a *tg(hsp70:bmp4, cmlc2:GFP)* embryo after heat shock at 24hpf. (K) Lateral and (L)

dorsal view of a wild type embryo. *cdh6* expression in the forebrain (arrowhead) and the optic fissure (arrow) is strongly decreased by ubiquitous *bmp4* expression.

**Figure S1:** Establishment of a TGF $\beta$  signaling reporter in zebrafish

(A) construct generated for the TGF $\beta$  signaling reporter. Multimerized Smad Binding Elements (SBEs) in combination with a minimal promoter (MP) drive membrane localized GFP (GFPcaax). (B) Brightfield, fluorescent and merged images of a zebrafish larvae expressing the TGF $\beta$  signaling reporter construct (21.5 hpf). Note the expression domains in the forebrain (encircled) and the tail. (C) In order to test the functionality, de-chorionated zebrafish larvae expressing the TGF $\beta$  signaling construct were exposed to a TGF $\beta$  signaling inhibitor (SB431542). The inhibitor suppressed the activity of the TGF $\beta$  signaling reporter dramatically (recorded at postembryonic stages). Please see the DMSO treated fish as control.

**Figure S2:** Early ubiquitous *bmp4* expression causes defects in optic cup morphogenesis. (A-F) Gross morphology of (A-C) *tg(hsp70:bmp4, cmlc2:GFP)* embryos and (D-F) wild type clutch mates at 3.5dpf after heat shock at timepoints between 21 and 23hpf. (A'-F') lateral and (A''-F'') ventral views of the same embryos. (A'-C'') Transgene embryos with ubiquitous expression of *bmp4* induced between 21 and 23hpf show coloboma caused by impaired optic cup morphogenesis as revealed by the lack of ventral retina and increased size of the temporal retinal domain. (D'-F'') Uninduced transgene embryos and their wild type clutchmates do not develop this phenotype.

| condition                | coloboma   | ambiguous <sup>a</sup> | severe defects | total N |
|--------------------------|------------|------------------------|----------------|---------|
| uninjected               | 0 (0%)     | 1 (0.9%)               | 3 (2.7%)       | 113     |
| control MO               | 0 (0%)     | 0 (0%)                 | 1 (1.3%)       | 76      |
| <i>cdh6</i> MO1 (11.5ng) | 30 (31.6%) | 19 (20%)               | 24 (25.3%)     | 95      |
| <i>cdh6</i> MO2 (4.5ng)  | 40 (50.6%) | 26 (32.9%)             | 1 (1.3%)       | 79      |

<sup>a</sup> abnormal pigmentation of the ventral retina

**Table: Results of *cdh6* MO injection.** The table shows combined numbers of 3 independent experiments for each condition.





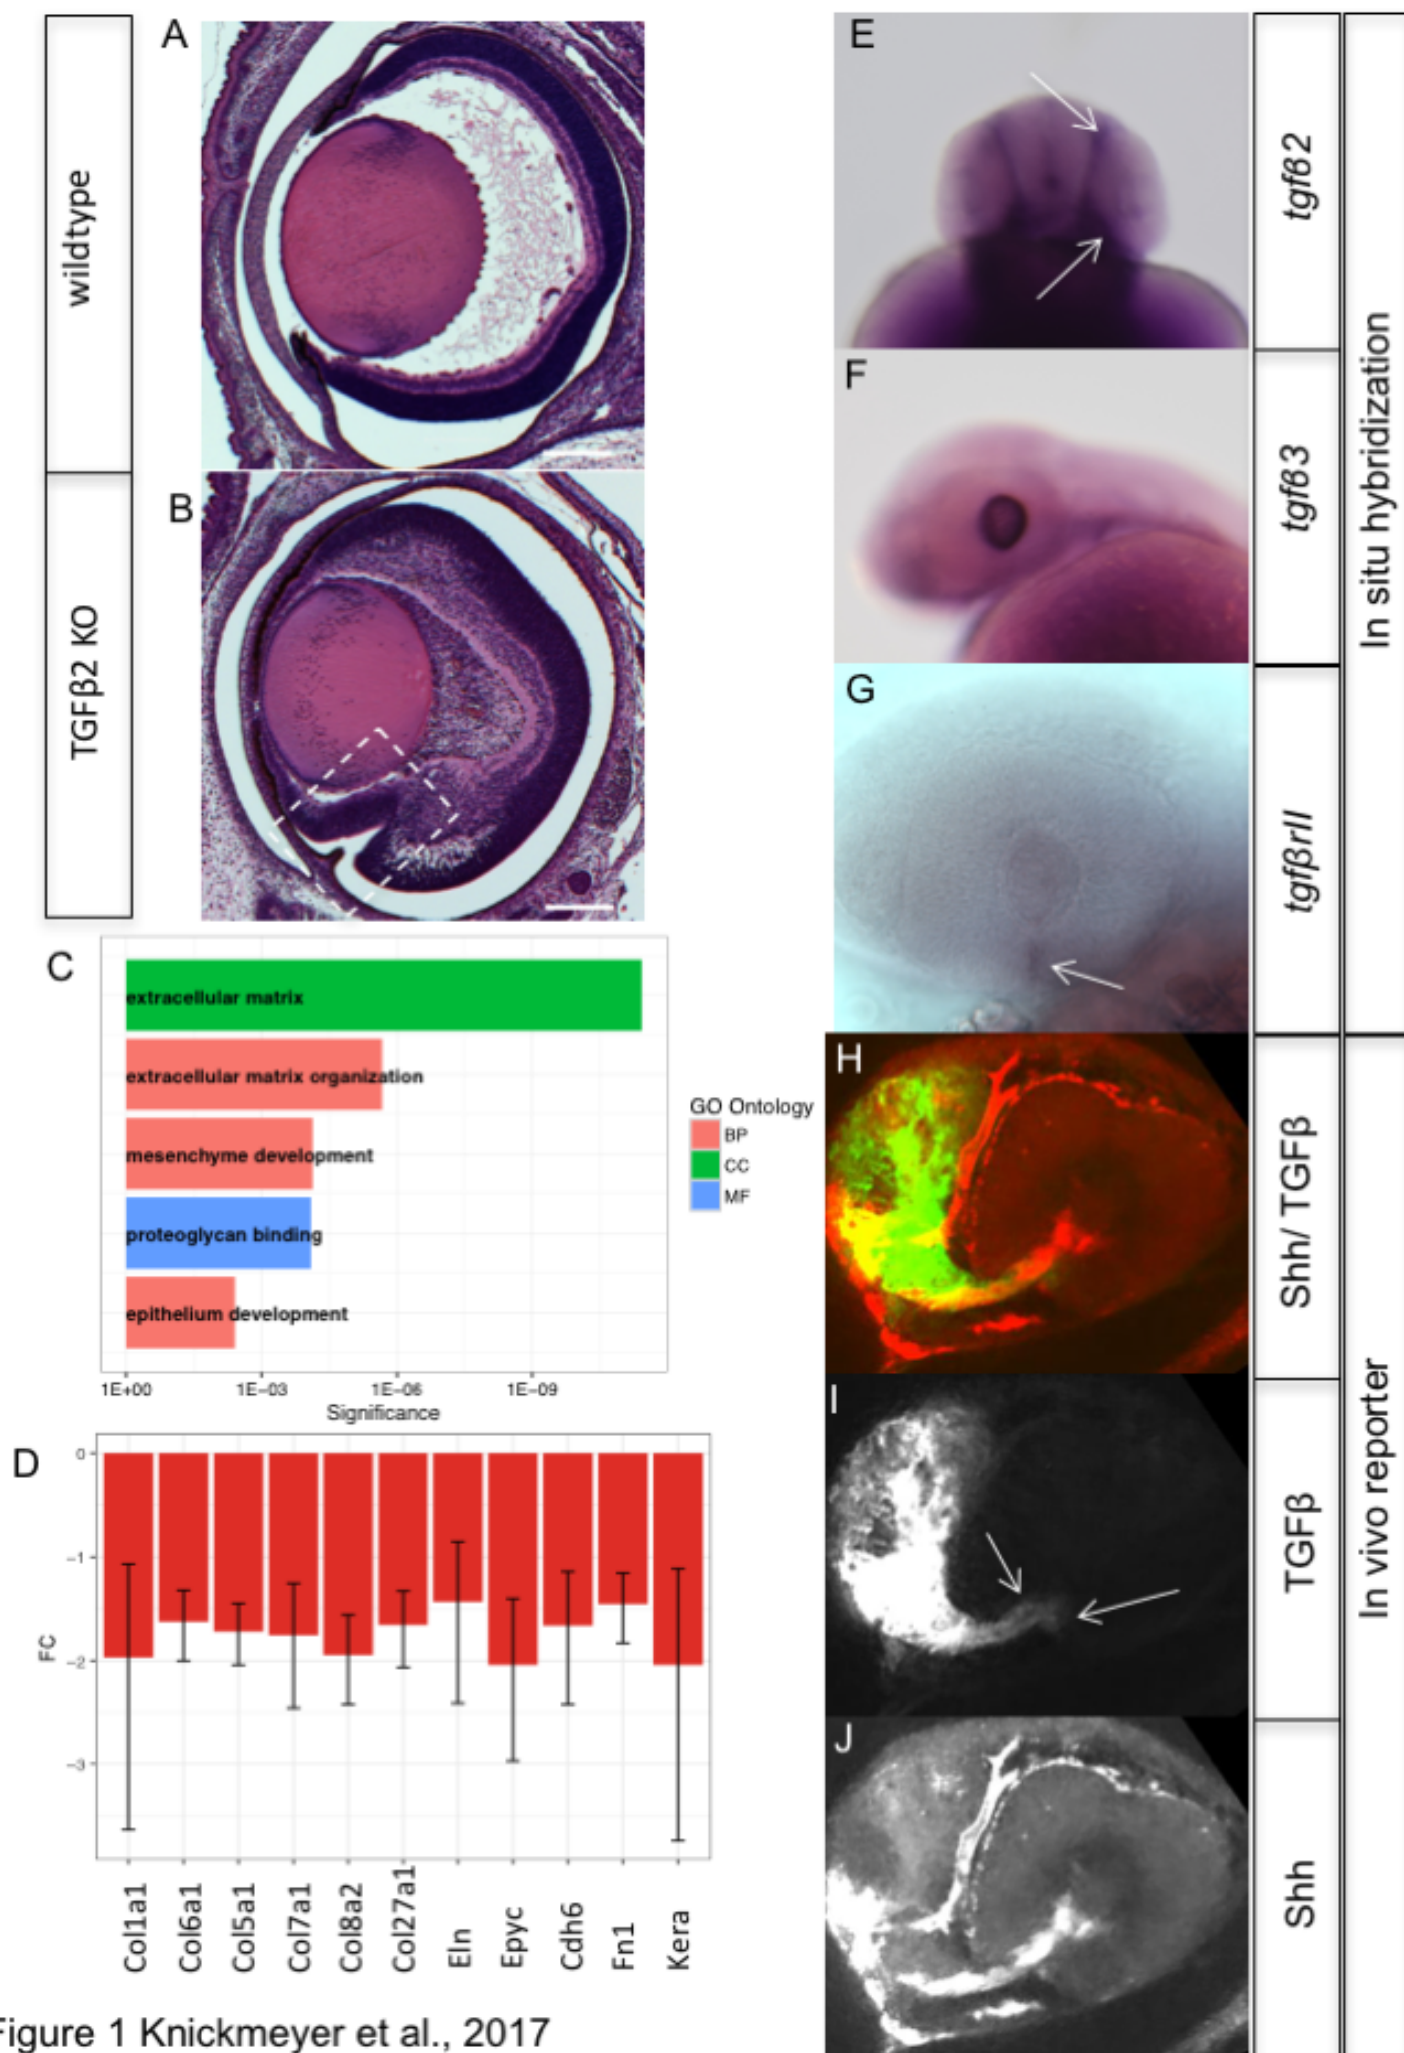

Figure 1 Knickmeyer et al., 2017



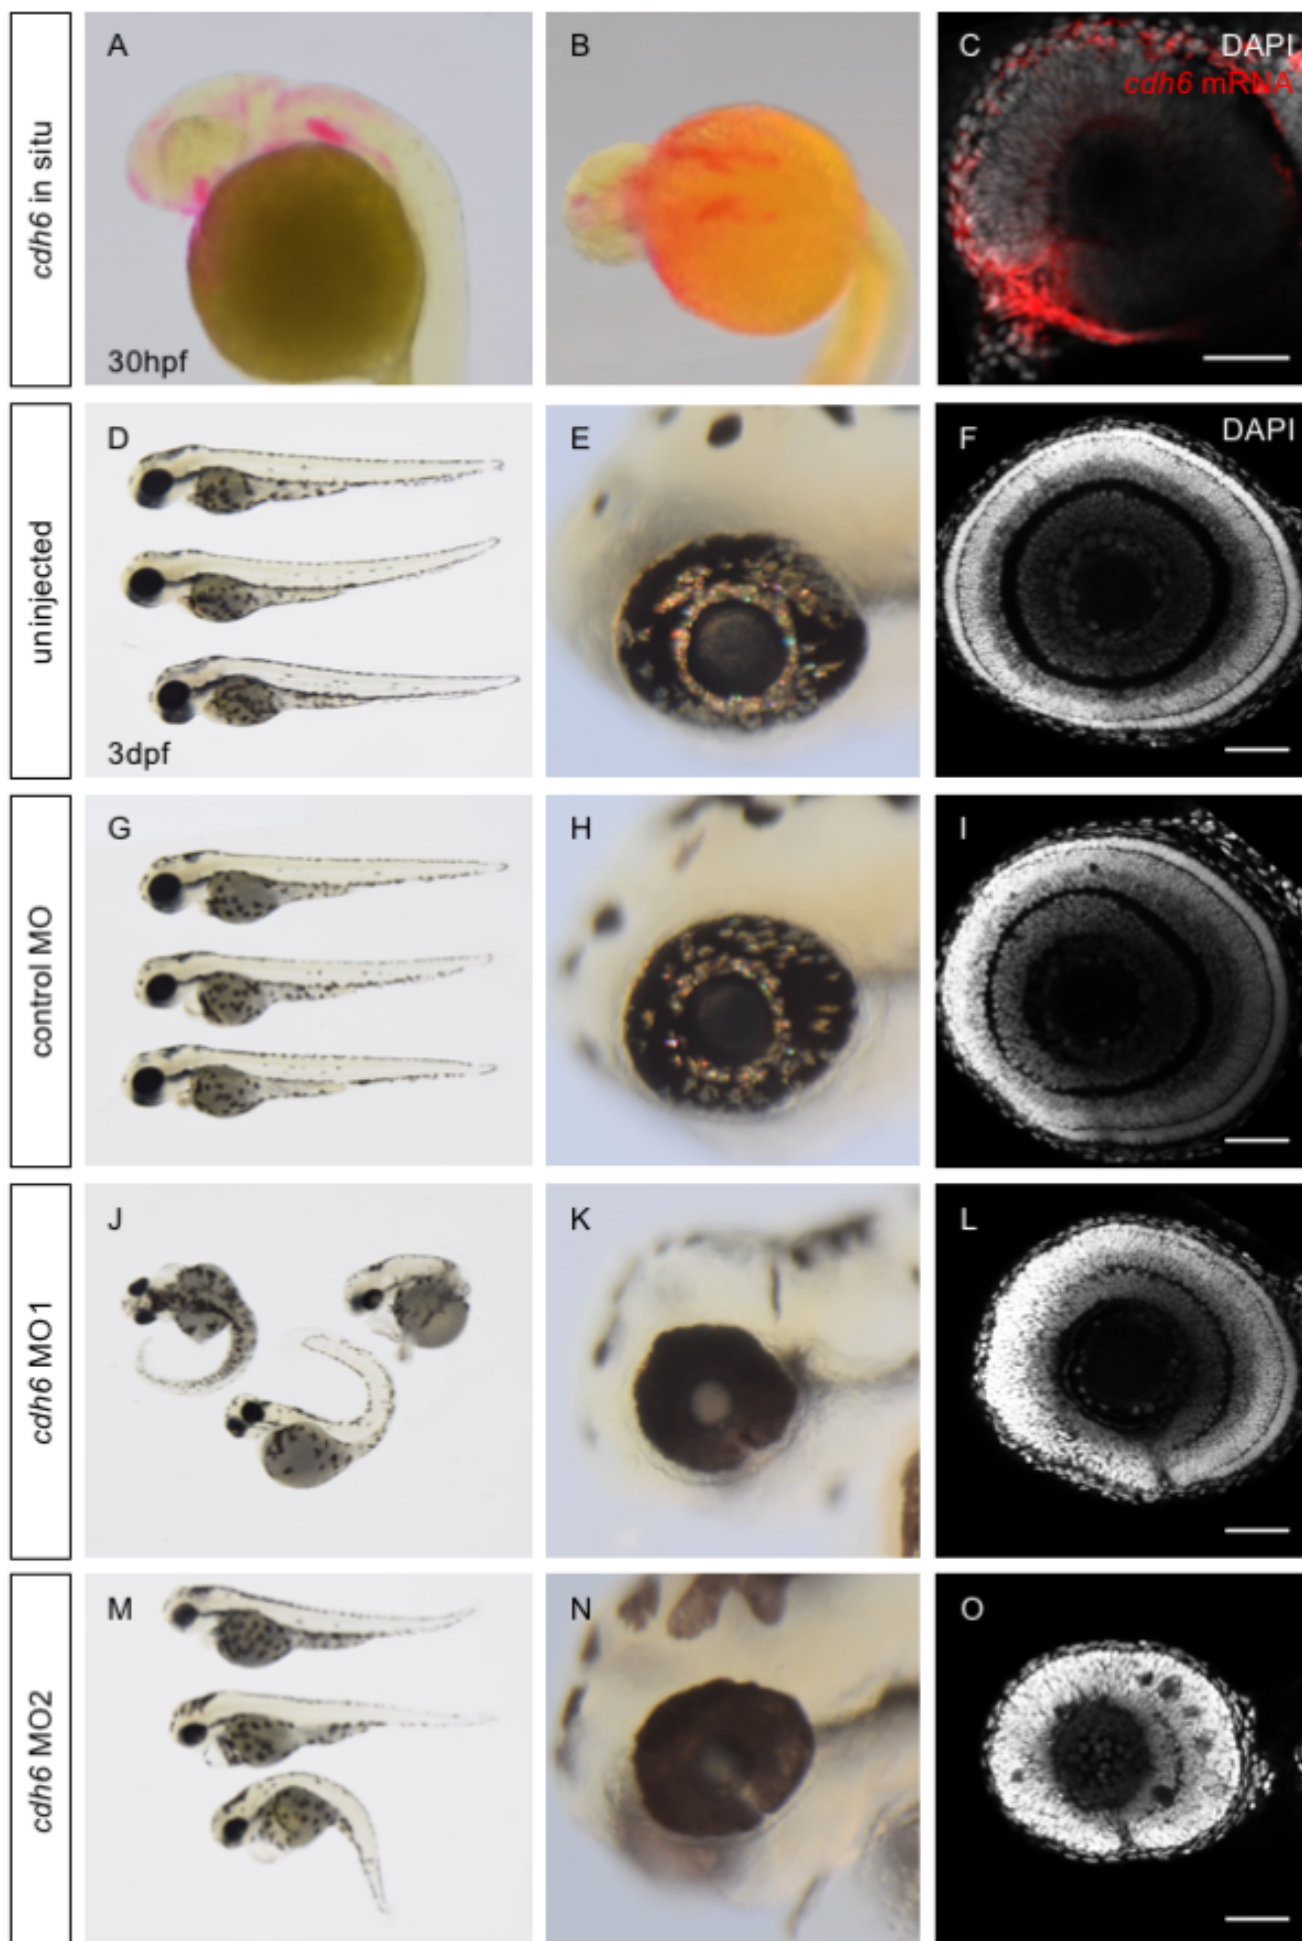

Figure 2 Knickmeyer et al., 2017

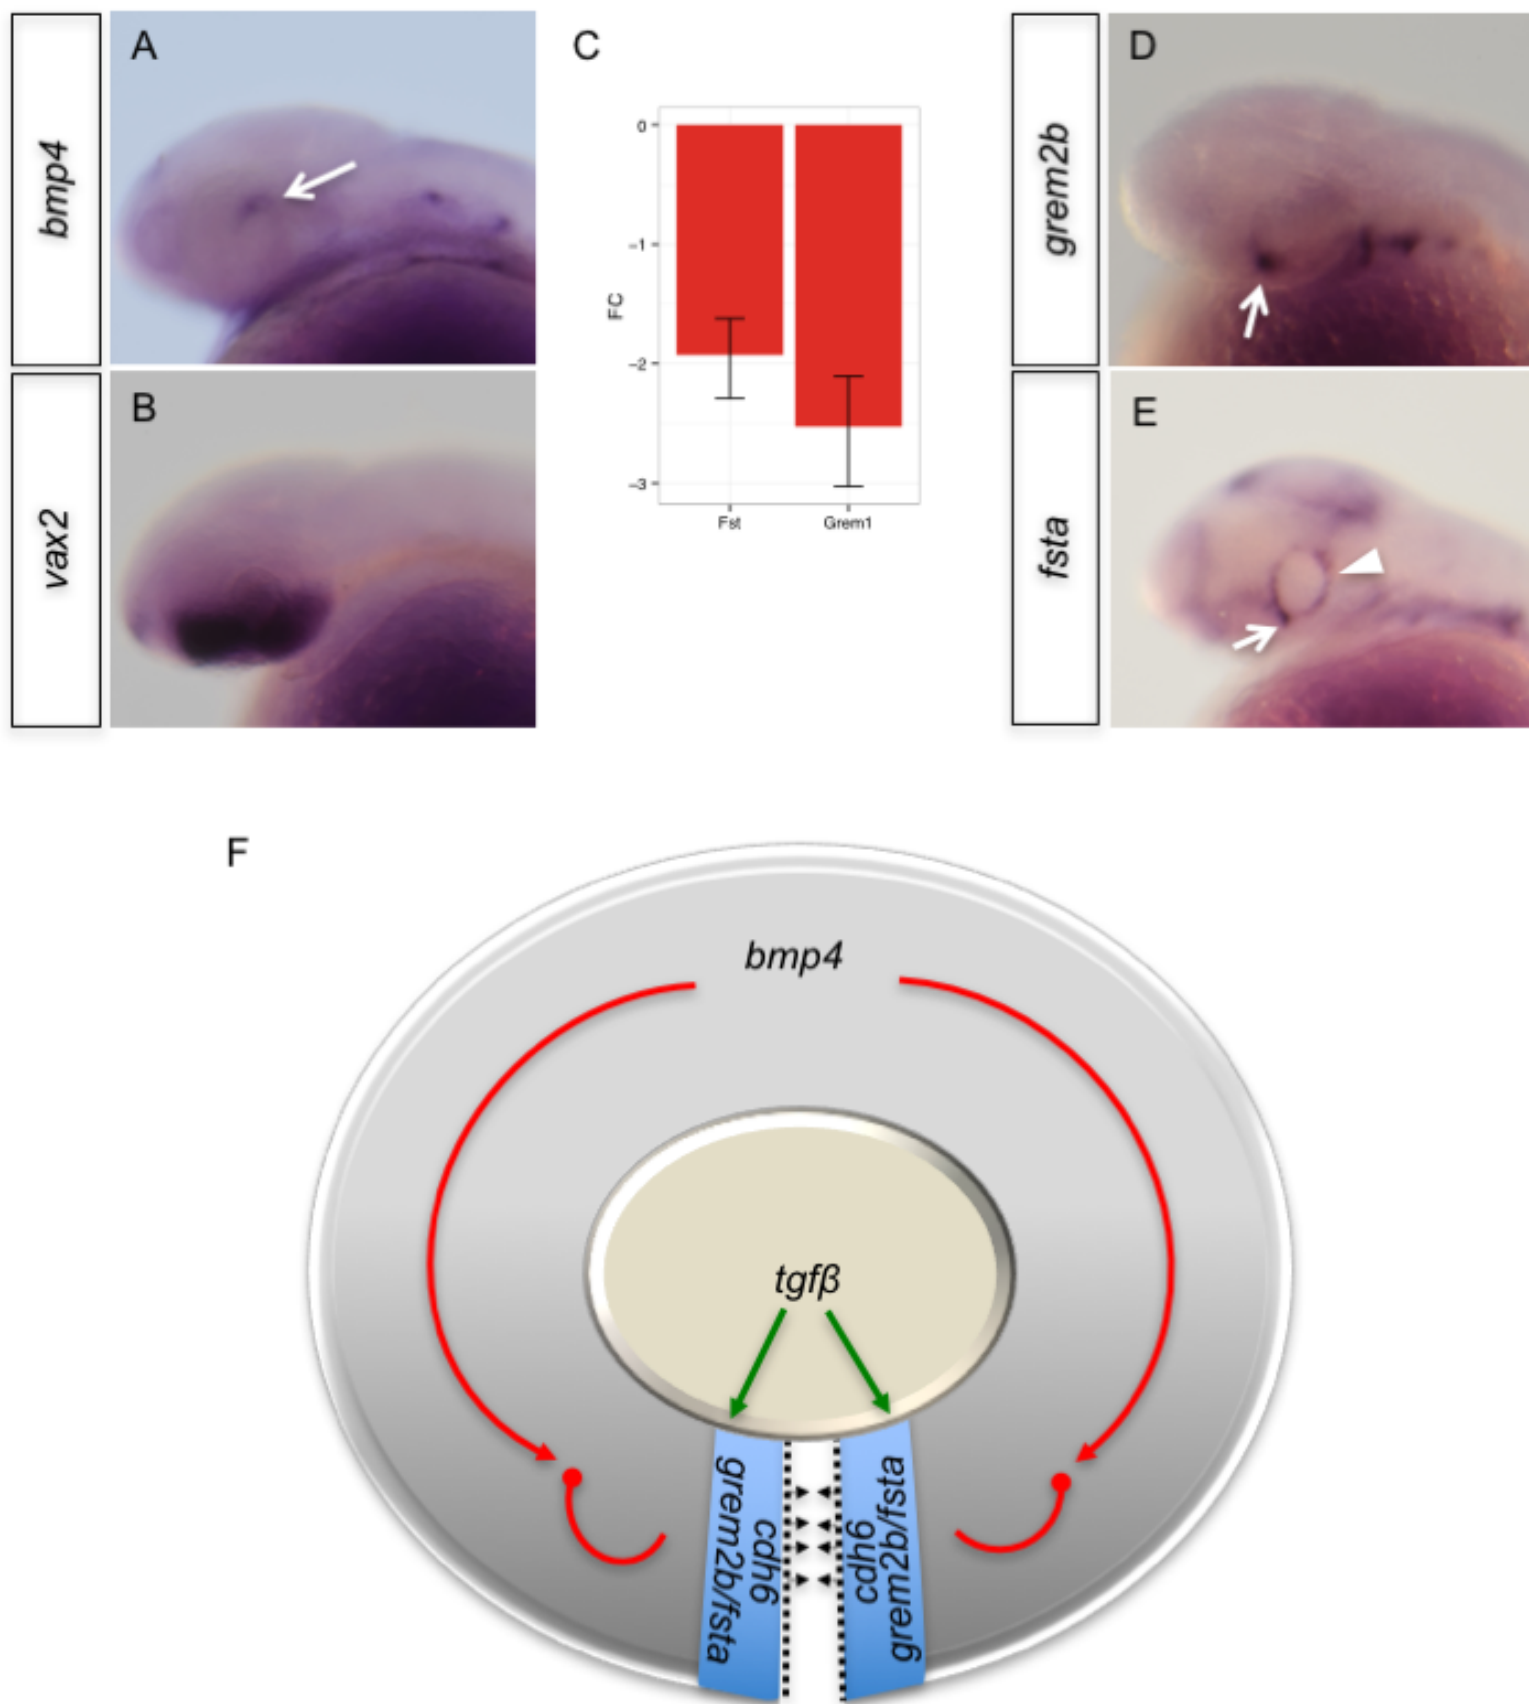

Figure 3 Knickmeyer et al., 2017

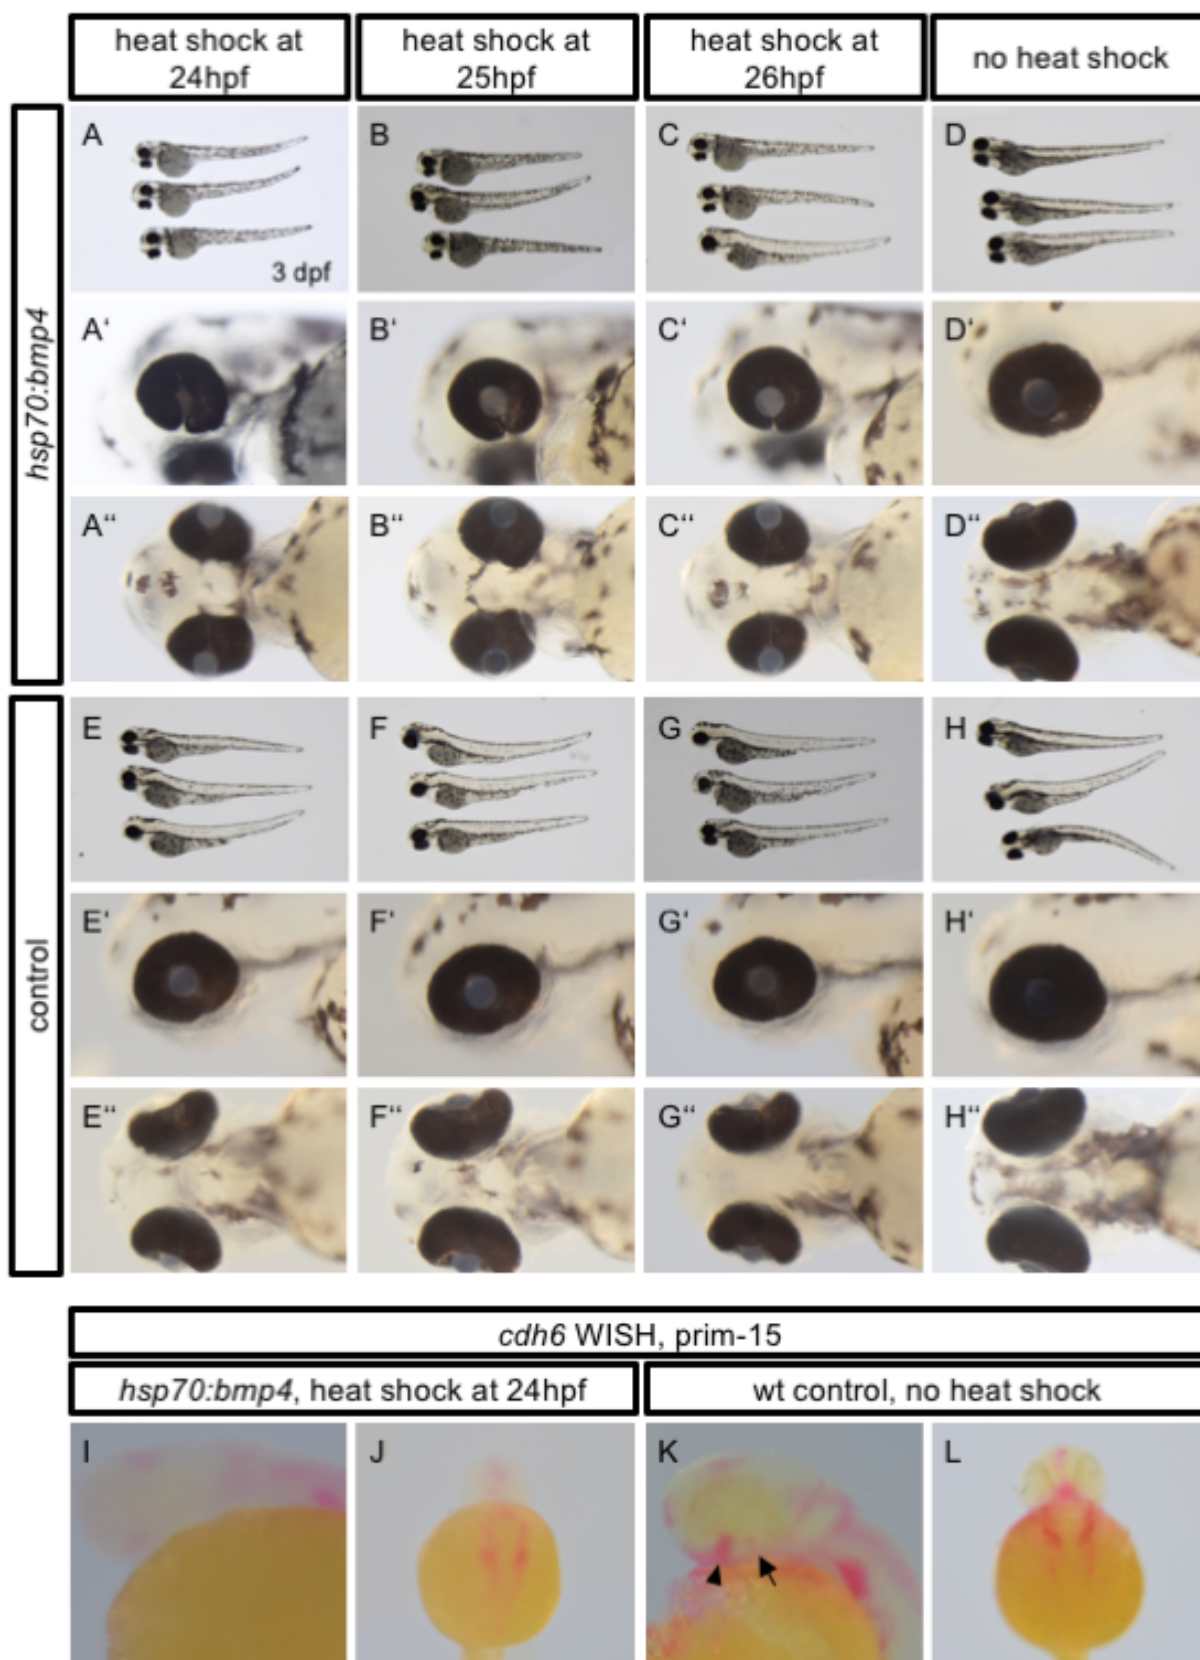

Figure 4 Knickmeyer et al., 2017
